# Supplementary material for: The laminin–keratin link shields the nucleus from mechanical deformation and signalling
Source: PubMed Central journal article supplement (PMC10627833; doi:10.1038/s41563-023-01657-3), 2023-09-14

Fig. 2J

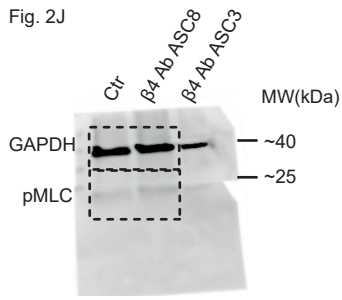

Extended data Fig. 3a

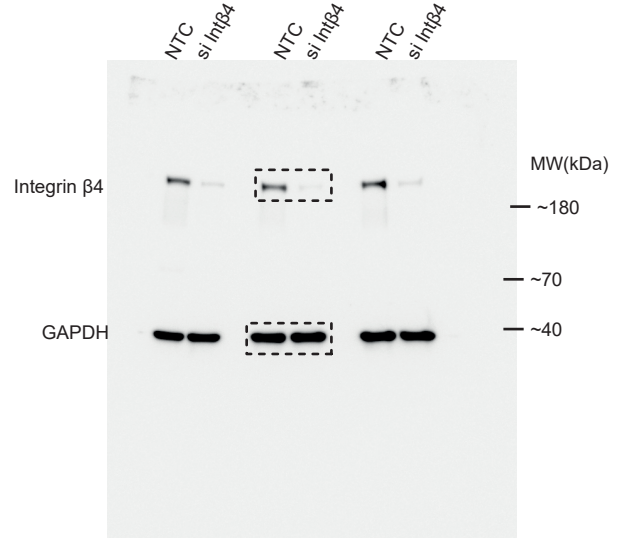

Extended data Fig. 3g

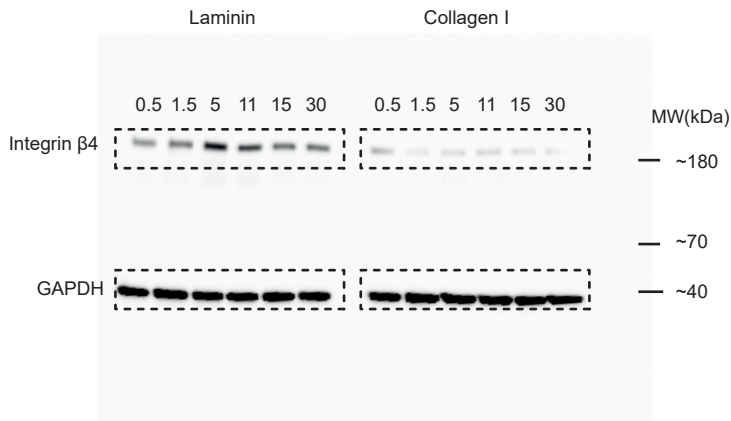

Extended data Fig. 5b

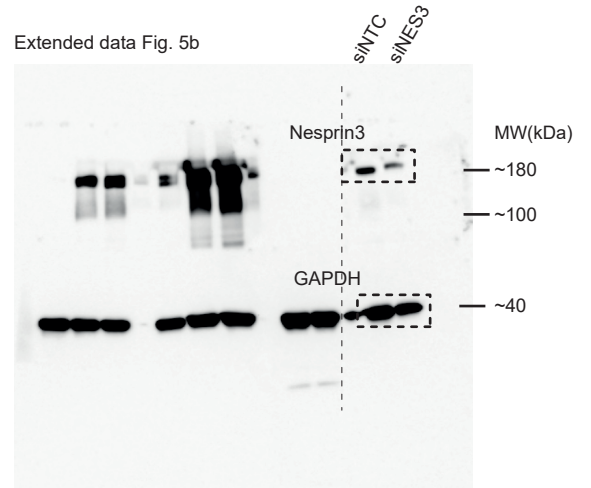

Extended data Fig. 4b

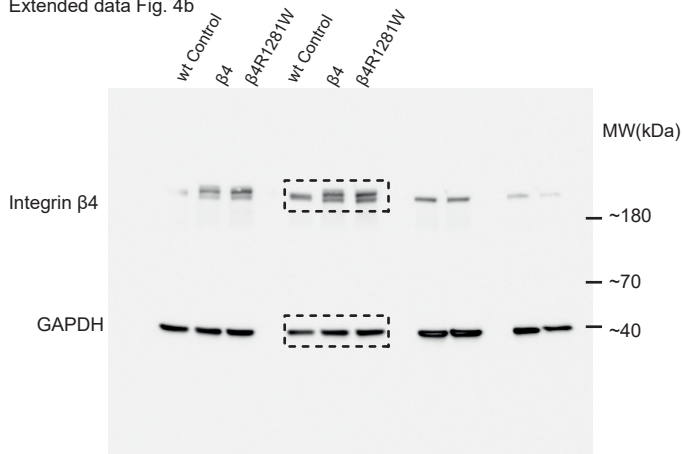

Extended data Fig. 8c

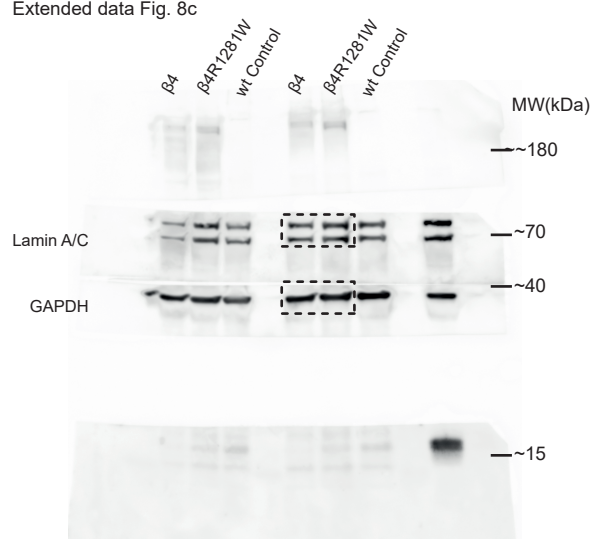

Supplement: 41563_2023_1657_MOESM5_ESM.pdf [file 41563_2023_1657_MOESM5_ESM.pdf]
